# Supplementary material for: Impact of Different Electronic Cohort Definitions to Identify Patients With Atrial Fibrillation From the Electronic Medical Record
Source: PubMed Central journal article supplement — J Am Heart Assoc. 2020 Feb 26;9(5):e014527. doi: 10.1161/JAHA.119.014527 (PMC7335556; doi:10.1161/jaha.119.014527), 2020-02-26
Supplement: JAH3-9-e014527-s001.pdf [file JAH3-9-e014527-s001.pdf]

# **SUPPLEMENTAL MATERIAL**

**Table S1. Model specifications.**

| Feature                                                                    | Definition                                                                                                              | Models                        |
|----------------------------------------------------------------------------|-------------------------------------------------------------------------------------------------------------------------|-------------------------------|
| Kaiser                                                                     | >1 outpatient ICD AF diagnosis billing code OR<br>1 outpatient ICD AF diagnosis billing code and ECG consistent with AF | Model 2                       |
| Medicare                                                                   | ≥1 inpatient ICD AF diagnosis billing code OR ≥2 outpatient ICD AF diagnoses billing codes within 365 days              | Model 1                       |
| <i>Demographics: Based on status at the time of the index AF encounter</i> |                                                                                                                         |                               |
| Age                                                                        | Ordinal; roughly according to decade (18 to 29, 30 to 39, 40 to 49, 50 to 59, 60 to 69, 70 to 79, 80 and older)         | Model 3<br>Model 5            |
| Sex                                                                        | Binary; female (reference) or male                                                                                      | Model 3<br>Model 5            |
| Race                                                                       | Categorical; white (reference), black, Asian, other/missing                                                             | Model 3<br>Model 5            |
| Hispanic                                                                   | Categorical; Hispanic, not Hispanic, or missing                                                                         | Model 3<br>Model 5            |
| Primary payer                                                              | Categorical; Medicare (reference), Medicaid, private, self, other/missing                                               | Model 3<br>Model 5            |
| Inpatient AF diagnosis                                                     | Binary; presence of an inpatient billing code at any time during the study period                                       | Model 1<br>Model 3<br>Model 5 |
| Number of outpatient AF diagnoses                                          | Numeric; the total number of outpatient AF billing codes during the study period                                        | Model 3<br>Model 5            |
| Primary AF diagnosis                                                       | Binary; presence of an AF billing code in the first billing position any time during the study period                   | Model 3<br>Model 5            |
| Acute myocardial infarction                                                | Binary; presence of an ICD diagnosis billing code for condition any time during the study period                        | Model 3<br>Model 5            |
| <i>Comorbid Conditions: Based on ICD billing codes</i>                     |                                                                                                                         |                               |
| Coronary artery disease                                                    | Binary; presence of an ICD diagnosis billing code for condition any time during the study period                        | Model 3                       |
| Valvular heart disease                                                     |                                                                                                                         | Model 5                       |
| Congestive heart failure                                                   |                                                                                                                         |                               |

|                                               |                                                                                                                                                                        |                    |
|-----------------------------------------------|------------------------------------------------------------------------------------------------------------------------------------------------------------------------|--------------------|
| Peripheral vascular disease                   |                                                                                                                                                                        |                    |
| Cerebrovascular disease                       |                                                                                                                                                                        |                    |
| Dementia                                      |                                                                                                                                                                        |                    |
| Pulmonary heart disease                       |                                                                                                                                                                        |                    |
| Rheumatologic disease                         |                                                                                                                                                                        |                    |
| Gastrointestinal ulcer                        |                                                                                                                                                                        |                    |
| Liver disease                                 |                                                                                                                                                                        |                    |
| Diabetes mellitus                             |                                                                                                                                                                        |                    |
| Acute renal disease                           |                                                                                                                                                                        |                    |
| Chronic renal disease                         |                                                                                                                                                                        |                    |
| Lymphoma                                      |                                                                                                                                                                        |                    |
| Hypertension                                  |                                                                                                                                                                        |                    |
| Coagulopathy                                  |                                                                                                                                                                        |                    |
| Electrolyte disorder                          |                                                                                                                                                                        |                    |
| Anemia                                        |                                                                                                                                                                        |                    |
| Cancer                                        |                                                                                                                                                                        |                    |
| Dialysis                                      |                                                                                                                                                                        |                    |
| <i>Procedures: Based on ICD billing codes</i> |                                                                                                                                                                        |                    |
| Heart valve surgery                           | Binary; presence of an ICD procedure billing code for procedure any time during the study period                                                                       | Model 3            |
| Coronary artery bypass grafting               |                                                                                                                                                                        | Model 5            |
| Percutaneous coronary intervention            |                                                                                                                                                                        |                    |
| Angiogram                                     |                                                                                                                                                                        |                    |
| Pacemaker/defibrillator                       |                                                                                                                                                                        |                    |
| Cardioversion (ICD based)                     |                                                                                                                                                                        |                    |
| <i>Procedures: Based on CPT billing codes</i> |                                                                                                                                                                        |                    |
| Cardioversion (CPT based)                     | Binary; presence of a CPT billing code for procedure any time during the study period                                                                                  | Model 5            |
| Ablation                                      |                                                                                                                                                                        |                    |
| <i>Electrocardiograms and text</i>            |                                                                                                                                                                        |                    |
| Electrocardiogram                             | Binary; presence of an ECG interpretation that includes an AF-specific term any time during the study period                                                           | Model 2<br>Model 5 |
| Number of AF mentions in the text             | Categorical, split into zero and quartiles for values >0; the total number of AF mentions, as extracted by NLP, in the available text any time during the study period | Model 5            |
| Non-negated AF mention in the text            | Binary; the presence of a non-negated reference to AF in the available text any time during the study period                                                           | Model 4            |

Model Definitions (also see Methods section of manuscript):

Model #1: Outpatient and inpatient AF billing codes (Medicare methodology)<sup>2</sup>:  $\geq 1$  inpatient diagnosis or  $\geq 2$  outpatient diagnoses within 365 days

Model #2: Outpatient AF codes and electrocardiogram (Kaiser methodology)<sup>4</sup>:  $>1$  outpatient ICD code, 1 outpatient ICD code and ECG consistent with AF

Model #3: Demographics and International Classification of Diseases (ICD) billing AF codes: A logistic regression model using patient demographics, presence of an inpatient AF diagnosis, presence of a primary AF diagnosis, number of outpatient AF diagnoses, comorbid conditions and procedures from ICD codes, year of index AF diagnosis

Model #4: Natural language processing: At least one non-negated mention of AF in the clinical text

Model #5: Comprehensive: A comprehensive logistic regression model combining patient demographics, presence of an inpatient AF diagnosis, presence of a primary AF diagnosis, number of outpatient AF diagnoses, comorbid conditions and procedures from ICD codes, year of index AF diagnosis, at least one non-negated mention of AF in clinical text, ECG with reference to AF, CPT codes for ablation or cardioversion

AF=atrial fibrillation; CPT=current procedural terminology; ICD=International Classification of Diseases

**Table S2. Target terms used in natural language processing task to identify atrial fibrillation patients from clinical notes.**

| Target term           | Regular Expression                                                                                                  |
|-----------------------|---------------------------------------------------------------------------------------------------------------------|
| afib                  | \bafib\b \batrial\sfib a-fib a\.\sfib a\.fib \ba\sfib\b                                                             |
|                       |                                                                                                                     |
| <b>Modifier terms</b> |                                                                                                                     |
| no                    | \bno(?:\sfurther)\b                                                                                                 |
| not                   | \bnot\b                                                                                                             |
| none                  | \bnone\b                                                                                                            |
| negative              | \bnegative\b                                                                                                        |
| denies                | denies denied denying                                                                                               |
| family                | \bmother\b \bfather\b \bsister\b \bbrother\b \bdaughter\b \bson\b \baunt\b \buncle\b \bgranddaughter\b \bgrandson\b |
| rule out              | r/o r\o \brule\s+out\b \brules\s+out\b \bruled\s+out\b                                                              |
| unlikely              | \bunlikely\b                                                                                                        |
| investigate           | \binvestigate\b \binvestigating\b                                                                                   |
| look for              | \blook\s+for\b\b                                                                                                    |
| differential          | \bdifferential\b\b ddx                                                                                              |
| possible              | \bpossible\b                                                                                                        |
| holter                | \b(holter event)\s+(monitor(ing)?\s+)?ordered\s+for\b\b ddx                                                         |
| etc                   | \betc\b                                                                                                             |
| screen for            | \bscreen\s+for\b                                                                                                    |
| risk of               | \brisk\s+(of for)\b                                                                                                 |
| suspicious            | \bsuspicious\b                                                                                                      |
| question of           | \bquestion\s+of\b                                                                                                   |

**Table S3. Training model regression results.**

| KAISER MODEL                                   |               |                                   |            |       |                      |          |
|------------------------------------------------|---------------|-----------------------------------|------------|-------|----------------------|----------|
| Logistic regression                            | Number of obs | =                                 | 786        |       |                      |          |
|                                                | LR chi2(1)    | =                                 | 78.77      |       |                      |          |
|                                                | Prob > chi2   | =                                 | 0.0000     |       |                      |          |
| Log likelihood = -349.45524                    | Pseudo R2     | =                                 | 0.1013     |       |                      |          |
| -----                                          |               |                                   |            |       |                      |          |
| binary_adj_goldstd                             | Coef.         | Std. Err.                         | z          | P> z  | [95% Conf. Interval] |          |
| -----                                          |               |                                   |            |       |                      |          |
| kaiser                                         | 1.723243      | .2125683                          | 8.11       | 0.000 | 1.306616             | 2.139869 |
| _cons                                          | .7256704      | .110745                           | 6.55       | 0.000 | .5086141             | .9427267 |
| -----                                          |               |                                   |            |       |                      |          |
| Logistic model for binary_adj_goldstd          |               |                                   |            |       |                      |          |
| number of observations = 786                   |               |                                   |            |       |                      |          |
| area under ROC curve = 0.6951                  |               |                                   |            |       |                      |          |
| Empirical cutpoint estimation                  |               |                                   |            |       |                      |          |
| Method:                                        |               | Liu                               |            |       |                      |          |
| Reference variable:                            |               | binary_adj_goldstd (0=neg, 1=pos) |            |       |                      |          |
| Classification variable:                       |               | kaiser_lr                         |            |       |                      |          |
| Empirical optimal cutpoint:                    |               | .7971682                          |            |       |                      |          |
| Sensitivity at cutpoint:                       |               | 0.60                              |            |       |                      |          |
| Specificity at cutpoint:                       |               | 0.79                              |            |       |                      |          |
| Area under ROC curve at cutpoint:              |               | 0.70                              |            |       |                      |          |
| (415 real changes made)                        |               |                                   |            |       |                      |          |
| Detailed report of sensitivity and specificity |               |                                   |            |       |                      |          |
| -----                                          |               |                                   |            |       |                      |          |
|                                                |               |                                   | Correctly  |       |                      |          |
| Cutpoint                                       | Sensitivity   | Specificity                       | Classified | LR+   | LR-                  |          |
| -----                                          |               |                                   |            |       |                      |          |



Log likelihood = -356.13488 Pseudo R2 = 0.0841

---

| binary_adj_goldstd | Coef.    | Std. Err. | z    | P> z  | [95% Conf. Interval] |          |
|--------------------|----------|-----------|------|-------|----------------------|----------|
| simpleicd          | 1.675786 | .2039045  | 8.22 | 0.000 | 1.27614              | 2.075431 |
| _cons              | .1563462 | .1689453  | 0.93 | 0.355 | -.1747804            | .4874729 |

---

Logistic model for binary\_adj\_goldstd

number of observations = 786

area under ROC curve = 0.6509

Empirical cutpoint estimation

Method: Liu  
Reference variable: binary\_adj\_goldstd (0=neg, 1=pos)  
Classification variable: medicare\_lr  
Empirical optimal cutpoint: .70051131  
Sensitivity at cutpoint: 0.88  
Specificity at cutpoint: 0.42  
Area under ROC curve at cutpoint: 0.65  
(645 real changes made)

Detailed report of sensitivity and specificity

---

| Cutpoint | Sensitivity | Specificity | Correctly  |        |        |
|----------|-------------|-------------|------------|--------|--------|
|          |             |             | Classified | LR+    | LR-    |
| ( >= 1 ) | 87.97%      | 42.21%      | 79.01%     | 1.5223 | 0.2849 |

---

| Obs | ROC    |           | -Asymptotic Normal-- |         |
|-----|--------|-----------|----------------------|---------|
|     | Area   | Std. Err. | [95% Conf. Interval] |         |
| 786 | 0.6509 | 0.0210    | 0.60978              | 0.69205 |



| binary_adj | medicare_class |      |       |
|------------|----------------|------|-------|
| _goldstd   | Pos.           | Neg. | Total |
| Abnormal   | 556            | 76   | 632   |
| Normal     | 89             | 65   | 154   |
| Total      | 645            | 141  | 786   |

True abnormal diagnosis defined as binary\_adj\_goldstd = 1

[95% Confidence Interval]

|                           |                   |       |       |       |
|---------------------------|-------------------|-------|-------|-------|
| Prevalence                | Pr (A)            | 80%   | 77%   | 83.1% |
| Sensitivity               | Pr (+ A)          | 88%   | 85.2% | 90.4% |
| Specificity               | Pr (- N)          | 42.2% | 34.3% | 50.4% |
| ROC area                  | (Sens. + Spec.)/2 | .651  | .61   | .692  |
| Likelihood ratio (+)      | Pr (+ A)/Pr (+ N) | 1.52  | 1.33  | 1.75  |
| Likelihood ratio (-)      | Pr (- A)/Pr (- N) | .285  | .215  | .377  |
| Odds ratio                | LR(+)/LR(-)       | 5.34  | 3.59  | 7.96  |
| Positive predictive value | Pr (A +)          | 86.2% | 83.3% | 88.8% |
| Negative predictive value | Pr (N -)          | 46.1% | 37.7% | 54.7% |

### ICD MODEL

|                             |               |   |        |
|-----------------------------|---------------|---|--------|
| Logistic regression         | Number of obs | = | 786    |
|                             | LR chi2(43)   | = | 260.73 |
|                             | Prob > chi2   | = | 0.0000 |
| Log likelihood = -258.47662 | Pseudo R2     | = | 0.3353 |

| binary_adj_goldstd | Coef.    | Std. Err. | z    | P> z  | [95% Conf. Interval] |          |
|--------------------|----------|-----------|------|-------|----------------------|----------|
| agegrp1            | .0446484 | .0099897  | 4.47 | 0.000 | .025069              | .0642279 |
| sex                | .358715  | .2435289  | 1.47 | 0.141 | -.1185929            | .8360229 |

|                      |           |          |       |       |           |           |  |
|----------------------|-----------|----------|-------|-------|-----------|-----------|--|
| race_categ           |           |          |       |       |           |           |  |
| Black                | -1.942464 | 1.308129 | -1.48 | 0.138 | -4.506349 | .6214212  |  |
| Asian                | -1.375892 | 1.244579 | -1.11 | 0.269 | -3.815221 | 1.063437  |  |
| Other/missing        | -.4826733 | .4840383 | -1.00 | 0.319 | -1.431371 | .4660243  |  |
| hispanic             | .0927108  | .1684888 | 0.55  | 0.582 | -.2375211 | .4229427  |  |
| index_payl_categ     |           |          |       |       |           |           |  |
| 2                    | .8464419  | .6084834 | 1.39  | 0.164 | -.3461637 | 2.039047  |  |
| 3                    | .0162844  | .3308754 | 0.05  | 0.961 | -.6322194 | .6647882  |  |
| 4                    | .4823887  | .6985767 | 0.69  | 0.490 | -.8867964 | 1.851574  |  |
| 5                    | 2.056091  | 1.095191 | 1.88  | 0.060 | -.0904435 | 4.202626  |  |
| inpatientdx          | 1.640814  | .3087453 | 5.31  | 0.000 | 1.035684  | 2.245943  |  |
| countoutpatient_afib | .4895864  | .0782739 | 6.25  | 0.000 | .3361723  | .6430004  |  |
| afibicd_primary      | -.9130516 | .2387842 | -3.82 | 0.000 | -1.38106  | -.4450431 |  |
| index_year           | .0646928  | .0550775 | 1.17  | 0.240 | -.0432571 | .1726428  |  |
| amidiag_all          | .3809207  | .4520047 | 0.84  | 0.399 | -.5049923 | 1.266834  |  |
| caddiag_all          | .0267004  | .2832404 | 0.09  | 0.925 | -.5284405 | .5818414  |  |
| valveddiag_all       | -.121885  | .2692074 | -0.45 | 0.651 | -.6495218 | .4057518  |  |
| chfdiag_all          | .2366036  | .3143618 | 0.75  | 0.452 | -.3795342 | .8527414  |  |
| pvddiag_all          | -.6911086 | .3083174 | -2.24 | 0.025 | -1.2954   | -.0868175 |  |
| cvddiag_all          | -1.278336 | .2852031 | -4.48 | 0.000 | -1.837324 | -.7193479 |  |
| dementiadiag_all     | -.0838705 | .3846242 | -0.22 | 0.827 | -.8377201 | .669979   |  |
| pulmdzdiag_all       | -.2523725 | .2855902 | -0.88 | 0.377 | -.812119  | .3073739  |  |
| rheumdiag_all        | .7370864  | .5824089 | 1.27  | 0.206 | -.404414  | 1.878587  |  |
| ulcerdiag_all        | .0170389  | .5962036 | 0.03  | 0.977 | -1.151499 | 1.185576  |  |
| liverdiag_all        | -.4056906 | .3076358 | -1.32 | 0.187 | -1.008646 | .1972644  |  |
| dmdiag_all           | -.0513154 | .2568892 | -0.20 | 0.842 | -.554809  | .4521781  |  |
| renaldiag_all        | .0839594  | .4110108 | 0.20  | 0.838 | -.7216069 | .8895257  |  |
| ckddiag_all          | .7758547  | .4285092 | 1.81  | 0.070 | -.0640079 | 1.615717  |  |
| lymphdiag_all        | .7620735  | .8795399 | 0.87  | 0.386 | -.961793  | 2.48594   |  |
| pulmhtndiag_all      | .1058361  | .3386697 | 0.31  | 0.755 | -.5579443 | .7696164  |  |
| htndiag_all          | .0271604  | .2786255 | 0.10  | 0.922 | -.5189355 | .5732563  |  |

|                       |  |           |          |       |       |           |          |
|-----------------------|--|-----------|----------|-------|-------|-----------|----------|
| thyroiddiag_all       |  | .2414638  | .2949052 | 0.82  | 0.413 | -.3365399 | .8194674 |
| coagdiag_all          |  | .3509488  | .3714666 | 0.94  | 0.345 | -.3771123 | 1.07901  |
| elecdiag_all          |  | -.1480849 | .3050795 | -0.49 | 0.627 | -.7460297 | .44986   |
| anemiadiag_all        |  | .1875522  | .3232971 | 0.58  | 0.562 | -.4460984 | .8212028 |
| cancerdiag_all        |  | .3973601  | .2820185 | 1.41  | 0.159 | -.155386  | .9501062 |
| dialysis_icdproc_all  |  | -.3362597 | .7277529 | -0.46 | 0.644 | -1.762629 | 1.09011  |
| valve_icdproc_all     |  | -.1382759 | .6785085 | -0.20 | 0.839 | -1.468128 | 1.191576 |
| cabg_icdproc_all      |  | -.0303663 | .8015717 | -0.04 | 0.970 | -1.601418 | 1.540685 |
| pci_icdproc_all       |  | .2712517  | .9442262 | 0.29  | 0.774 | -1.579398 | 2.121901 |
| angio_icdproc_all     |  | .0102707  | .6437773 | 0.02  | 0.987 | -1.25151  | 1.272051 |
| ppm_defib_icdproc_all |  | -.8168417 | .6898823 | -1.18 | 0.236 | -2.168986 | .5353027 |
| dccv_icdproc_all      |  | 1.196939  | .8358149 | 1.43  | 0.152 | -.4412278 | 2.835106 |
| _cons                 |  | -132.932  | 110.9735 | -1.20 | 0.231 | -350.436  | 84.57198 |

-----  
Note: 0 failures and 44 successes completely determined.

Logistic model for binary\_adj\_goldstd

number of observations = 786

area under ROC curve = 0.8738

Empirical cutpoint estimation

Method: Liu  
Reference variable: binary\_adj\_goldstd (0=neg, 1=pos)  
Classification variable: icd\_lr  
Empirical optimal cutpoint: .77046734  
Sensitivity at cutpoint: 0.78  
Specificity at cutpoint: 0.81  
Area under ROC curve at cutpoint: 0.80

(525 real changes made)

Detailed report of sensitivity and specificity

-----  
Correctly  
Cutpoint      Sensitivity      Specificity      Classified      LR+      LR-  
-----

( >= 1 )              78.48%              81.17%              79.01%              4.1676              0.2651

-----

```

                ROC                -Asymptotic Normal--
Obs         Area         Std. Err.         [95% Conf. Interval]
-----
786         0.7982         0.0178         0.76337         0.83313

```

| binary_adj | icd_class |      |       |
|------------|-----------|------|-------|
| _goldstd   | Pos.      | Neg. | Total |
| Abnormal   | 496       | 136  | 632   |
| Normal     | 29        | 125  | 154   |
| Total      | 525       | 261  | 786   |

True abnormal diagnosis defined as binary\_adj\_goldstd = 1

[95% Confidence Interval]

Prevalence                              Pr (A)              80%              77%              83.1%

Sensitivity                              Pr (+|A)              78.5%              75.1%              81.6%

Specificity                              Pr (-|N)              81.2%              74.1%              87%

ROC area                              (Sens. + Spec.)/2              .798              .763              .833

Likelihood ratio (+)              Pr (+|A)/Pr (+|N)              4.17              2.99              5.8

Likelihood ratio (-)              Pr (-|A)/Pr (-|N)              .265              .224              .313

Odds ratio                              LR(+)/LR(-)              15.7              10.1              24.5

Positive predictive value              Pr (A|+)              94.5%              92.2%              96.3%

Negative predictive value              Pr (N|-)              47.9%              41.7%              54.1%

### NLP MODEL

Logistic regression                                              Number of obs              =              786

```

LR chi2(1) = 287.78
Prob > chi2 = 0.0000
Pseudo R2 = 0.3701
Log likelihood = -244.94682

```

```

-----
binary_adj_goldstd |      Coef.   Std. Err.      z    P>|z|     [95% Conf. Interval]
-----+-----
afnlp_mrn_predict |  4.061283   .2916117   13.93   0.000   3.489735   4.632831
      _cons | -1.684339   .2566414   -6.56   0.000  -2.187347  -1.181331
-----

```

Logistic model for binary\_adj\_goldstd

number of observations = 786

area under ROC curve = 0.8007

Empirical cutpoint estimation

```

Method:                               Liu
Reference variable:                   binary_adj_goldstd (0=neg, 1=pos)
Classification variable:              afnlp_lr
Empirical optimal cutpoint:           .53578696
Sensitivity at cutpoint:              0.97
Specificity at cutpoint:              0.63
Area under ROC curve at cutpoint:     0.80
(671 real changes made)

```

Detailed report of sensitivity and specificity

```

-----
                          Correctly
Cutpoint   Sensitivity   Specificity   Classified   LR+   LR-
-----
( >= 1 )   97.15%         62.99%       90.46%       2.6248  0.0452
-----

```

```

ROC
Obs   Area   Std. Err.   [95% Conf. Interval]
-----
-Asymptotic Normal--
-----

```

786      0.8007      0.0198      0.76189      0.83949

| binary_adj | afnlp_class |      |       |
|------------|-------------|------|-------|
| _goldstd   | Pos.        | Neg. | Total |
| Abnormal   | 614         | 18   | 632   |
| Normal     | 57          | 97   | 154   |
| Total      | 671         | 115  | 786   |

True abnormal diagnosis defined as binary\_adj\_goldstd = 1

[95% Confidence Interval]

|                           |                   |       |       |       |
|---------------------------|-------------------|-------|-------|-------|
| Prevalence                | Pr (A)            | 80%   | 77%   | 83.1% |
| Sensitivity               | Pr (+ A)          | 97.2% | 95.5% | 98.3% |
| Specificity               | Pr (- N)          | 63%   | 54.8% | 70.6% |
| ROC area                  | (Sens. + Spec.)/2 | .801  | .762  | .839  |
| Likelihood ratio (+)      | Pr (+ A)/Pr (+ N) | 2.62  | 2.14  | 3.23  |
| Likelihood ratio (-)      | Pr (- A)/Pr (- N) | .0452 | .0282 | .0724 |
| Odds ratio                | LR (+)/LR (-)     | 58    | 32.9  | 102   |
| Positive predictive value | Pr (A +)          | 91.5% | 89.1% | 93.5% |
| Negative predictive value | Pr (N -)          | 84.3% | 76.4% | 90.5% |

### COMPREHENSIVE MODEL

|                             |               |   |        |
|-----------------------------|---------------|---|--------|
| Logistic regression         | Number of obs | = | 786    |
|                             | LR chi2(47)   | = | 459.16 |
|                             | Prob > chi2   | = | 0.0000 |
| Log likelihood = -159.26033 | Pseudo R2     | = | 0.5904 |

| binary_adj_goldstd | Coef. | Std. Err. | z | P> z | [95% Conf. Interval] |
|--------------------|-------|-----------|---|------|----------------------|
|--------------------|-------|-----------|---|------|----------------------|

|                      |  |           |          |       |       |           |           |
|----------------------|--|-----------|----------|-------|-------|-----------|-----------|
| afnlp_mrn_predict    |  | 2.2063    | .5049817 | 4.37  | 0.000 | 1.216554  | 3.196046  |
| agegrp1              |  | .0328202  | .0130682 | 2.51  | 0.012 | .0072069  | .0584335  |
| sex                  |  | .006181   | .3288827 | 0.02  | 0.985 | -.6384173 | .6507793  |
|                      |  |           |          |       |       |           |           |
| race_categ           |  |           |          |       |       |           |           |
| Black                |  | -2.187707 | 1.514649 | -1.44 | 0.149 | -5.156364 | .7809499  |
| Asian                |  | .2546778  | 3.239757 | 0.08  | 0.937 | -6.095129 | 6.604485  |
| Other/missing        |  | -.656952  | .6036018 | -1.09 | 0.276 | -1.83999  | .5260858  |
|                      |  |           |          |       |       |           |           |
| hispanic             |  | .1670156  | .2225115 | 0.75  | 0.453 | -.269099  | .6031302  |
|                      |  |           |          |       |       |           |           |
| index_pay1_categ     |  |           |          |       |       |           |           |
| 2                    |  | .5163838  | .7883102 | 0.66  | 0.512 | -1.028676 | 2.061443  |
| 3                    |  | -.2421059 | .4610076 | -0.53 | 0.599 | -1.145664 | .6614523  |
| 4                    |  | .9414504  | .8906946 | 1.06  | 0.291 | -.804279  | 2.68718   |
| 5                    |  | 2.136887  | 1.231747 | 1.73  | 0.083 | -.2772917 | 4.551066  |
|                      |  |           |          |       |       |           |           |
| inpatientdx          |  | -.1369238 | .4172727 | -0.33 | 0.743 | -.9547633 | .6809157  |
| countoutpatient_afib |  | .1403936  | .0740849 | 1.90  | 0.058 | -.0048101 | .2855974  |
| afibicd_primary      |  | -1.262697 | .3451367 | -3.66 | 0.000 | -1.939153 | -.5862419 |
| index_year           |  | -.0405696 | .075878  | -0.53 | 0.593 | -.1892877 | .1081485  |
| amidiag_all          |  | .561467   | .6321116 | 0.89  | 0.374 | -.6774491 | 1.800383  |
| caddiag_all          |  | -.0842321 | .3797421 | -0.22 | 0.824 | -.8285129 | .6600487  |
| valveddiag_all       |  | -.0823799 | .3639308 | -0.23 | 0.821 | -.7956711 | .6309113  |
| chfdiag_all          |  | -.113876  | .4480115 | -0.25 | 0.799 | -.9919625 | .7642104  |
| pvddiag_all          |  | -.6556172 | .4073686 | -1.61 | 0.108 | -1.454045 | .1428106  |
| cvddiag_all          |  | -1.12224  | .3907799 | -2.87 | 0.004 | -1.888155 | -.3563258 |
| dementiadiag_all     |  | .0200449  | .5326683 | 0.04  | 0.970 | -1.023966 | 1.064056  |
| pulmdzdiag_all       |  | -.3854925 | .3913458 | -0.99 | 0.325 | -1.152516 | .3815311  |
| rheumdiag_all        |  | .5394939  | .8438259 | 0.64  | 0.523 | -1.114374 | 2.193362  |
| ulcerdiag_all        |  | .2380188  | .8312635 | 0.29  | 0.775 | -1.391228 | 1.867265  |
| liverdiag_all        |  | -.4841053 | .4199376 | -1.15 | 0.249 | -1.307168 | .3389572  |
| dmdiag_all           |  | -.0962111 | .3521609 | -0.27 | 0.785 | -.7864338 | .5940115  |
| renaldiag_all        |  | -.2154304 | .5936916 | -0.36 | 0.717 | -1.379045 | .9481838  |

|                       |  |           |          |       |       |           |          |
|-----------------------|--|-----------|----------|-------|-------|-----------|----------|
| ckddiag_all           |  | 1.626106  | .6297206 | 2.58  | 0.010 | .391876   | 2.860335 |
| lymphdiag_all         |  | .5713589  | 1.101511 | 0.52  | 0.604 | -1.587562 | 2.73028  |
| pulmhtndiag_all       |  | .4727443  | .4709309 | 1.00  | 0.315 | -.4502633 | 1.395752 |
| htndiag_all           |  | -.5871352 | .3913627 | -1.50 | 0.134 | -1.354192 | .1799215 |
| thyroiddiag_all       |  | .012911   | .4038323 | 0.03  | 0.974 | -.7785859 | .8044078 |
| coagdiag_all          |  | .4569073  | .5011965 | 0.91  | 0.362 | -.5254199 | 1.439234 |
| elecdiag_all          |  | -.613357  | .4176761 | -1.47 | 0.142 | -1.431987 | .2052732 |
| anemiadiag_all        |  | .2884396  | .4747701 | 0.61  | 0.543 | -.6420927 | 1.218972 |
| cancerdiag_all        |  | .1483555  | .38792   | 0.38  | 0.702 | -.6119538 | .9086648 |
| dialysis_icdproc_all  |  | -.9619088 | 1.086018 | -0.89 | 0.376 | -3.090466 | 1.166648 |
| valve_icdproc_all     |  | -1.106743 | .9657247 | -1.15 | 0.252 | -2.999529 | .7860425 |
| cabg_icdproc_all      |  | 1.961944  | 1.187286 | 1.65  | 0.098 | -.3650924 | 4.288981 |
| pai_icdproc_all       |  | -.623917  | 1.42916  | -0.44 | 0.662 | -3.425019 | 2.177185 |
| angio_icdproc_all     |  | -.3559314 | .8904829 | -0.40 | 0.689 | -2.101246 | 1.389383 |
| ppm_defib_icdproc_all |  | .0118631  | 1.02624  | 0.01  | 0.991 | -1.99953  | 2.023257 |
| dccv_icdcpt_binary    |  | -.0867684 | 1.027261 | -0.08 | 0.933 | -2.100162 | 1.926625 |
| ablate_cpt_binary     |  | -1.658924 | 1.220243 | -1.36 | 0.174 | -4.050557 | .7327092 |
| ecg_afib              |  | 2.881581  | .6455071 | 4.46  | 0.000 | 1.616411  | 4.146752 |
| q_afnlp_total         |  | 1.182809  | .2549187 | 4.64  | 0.000 | .683178   | 1.682441 |
| _cons                 |  | 78.62454  | 152.8337 | 0.51  | 0.607 | -220.9241 | 378.1731 |

-----  
Note: 0 failures and 14 successes completely determined.

Logistic model for binary\_adj\_goldstd

number of observations = 786

area under ROC curve = 0.9504

Empirical cutpoint estimation

Method: Liu  
Reference variable: binary\_adj\_goldstd (0=neg, 1=pos)  
Classification variable: comprehensive\_lr  
Empirical optimal cutpoint: .7892637  
Sensitivity at cutpoint: 0.90  
Specificity at cutpoint: 0.87  
Area under ROC curve at cutpoint: 0.89



(591 real changes made)

Detailed report of sensitivity and specificity

| Cutpoint | Sensitivity | Specificity | Correctly Classified | LR+    | LR-    |
|----------|-------------|-------------|----------------------|--------|--------|
| ( >= 1 ) | 90.35%      | 87.01%      | 89.69%               | 6.9568 | 0.1109 |

| Obs | ROC Area | Std. Err. | -Asymptotic Normal--<br>[95% Conf. Interval] |
|-----|----------|-----------|----------------------------------------------|
| 786 | 0.8868   | 0.0148    | 0.85779 0.91582                              |

| binary_adj   comprehensive_class |      |      |       |
|----------------------------------|------|------|-------|
| _goldstd                         | Pos. | Neg. | Total |
| Abnormal                         | 571  | 61   | 632   |
| Normal                           | 20   | 134  | 154   |
| Total                            | 591  | 195  | 786   |

True abnormal diagnosis defined as binary\_adj\_goldstd = 1

|                      |                   | [95% Confidence Interval] |       |       |
|----------------------|-------------------|---------------------------|-------|-------|
| Prevalence           | Pr(A)             | 80%                       | 77%   | 83.1% |
| Sensitivity          | Pr(+ A)           | 90.3%                     | 87.8% | 92.5% |
| Specificity          | Pr(- N)           | 87%                       | 80.7% | 91.9% |
| ROC area             | (Sens. + Spec.)/2 | .887                      | .858  | .916  |
| Likelihood ratio (+) | Pr(+ A)/Pr(+ N)   | 6.96                      | 4.62  | 10.5  |
| Likelihood ratio (-) | Pr(- A)/Pr(- N)   | .111                      | .0867 | .142  |
| Odds ratio           | LR(+)/LR(-)       | 62.7                      | 36.7  | 107   |

|                           |            |       |       |       |
|---------------------------|------------|-------|-------|-------|
| Positive predictive value | $\Pr(A +)$ | 96.6% | 94.8% | 97.9% |
| Negative predictive value | $\Pr(N -)$ | 68.7% | 61.7% | 75.2% |

-----
